# Supplementary material
Source: Springer Nature journal article supplement (https://www.springermedizin.de/resource/supplementary/12992_2013_284_MOESM1_ESM.pdf/9616270)
Supplement: MOESM1 [file 9616270]

Codified Scientific and  
Technical Knowledge

Experience-based  
learning

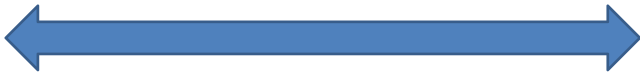

Explicit knowledge  
Global knowledge

Implicit knowledge  
Local knowledge

### **Know –what**

Formal evaluations  
& research studies  
on specific business  
models or market  
Mechanisms

### **Know –why**

Reporting data (eg.  
# providers,  
market-share, types  
of patient.  
Regulatory data on  
quality of care

### **Know –how**

Guidance on good  
practices drawn  
from operational  
knowledge eg.  
optimal contractual  
forms for franchises

### **Know –who**

Networks of  
investors, or private  
hospital associations  
that provide access  
to expertise in  
specific topics
